# Supplementary material for: Abscisic Acid Regulates Auxin Homeostasis in Rice Root Tips to Promote Root Hair Elongation
Source: Front Plant Sci. 2017 Jun 28;8:1121. doi: 10.3389/fpls.2017.01121 (PMC5487450; doi:10.3389/fpls.2017.01121)
Supplement: Supplementary file 2 [file Table_2.XLSX]

## Sheet: Sheet1
Real-time data	TipCK	Tip ABA	LRH CK	LRH ABA	SRH CK	SRH ABA			TipCK	Tip ABA	LRH CK	LRH ABA	SRH CK	SRH ABA
OsPIN1a	1	2.49264	3.16341	9.12515	4.91647	9.65473			1	2.49264	3.16341	9.12515	4.91647	9.65473		0.843434
OsPIN1b	1	2.37508	3.275	8.54746	6.08617	6.37098			1	2.37508	3.275	8.54746	6.08617	6.37098
OsPIN1c	1	2.84421	14.1883	53.3323	16.7985	26.2028			1	2.84421	14.1883	53.3323	16.7985	26.2028
OsPIN1d	1	1.92442	30.2283	70.6963	50.095	88.5415			1	1.92442	30.2283	70.6963	50.095	88.5415
OsPIN2	1	1.36238	0.04211	0.29785	0.31516	0.47153			1	1.36238	0.04211	0.29785	0.31516	0.47153
OsPIN5a	1	1.56218	71.4833	142.861	261.03	358.494			1	1.56218	71.4833	142.861	261.03	358.494
OsPIN5b	1	0.86277	8.4367	41.2522	30.1853	66.1987				1	9.77862	47.8137	34.9865	76.7281
OsPIN5c	1	0.43217	3.2173	8.7522	30.3484	40.2046			1	0.43217	3.2173	8.7522	30.3484	40.2046
OsPIN8	1	0.92046	10.4466	45.8007	33.5604	115.752			1	0.92046	10.4466	45.8007	33.5604	115.752
OsPIN10a	0.94588	0.73002	13.1383	18.1145	20.2693	38.7426				1	17.9972	24.8138	27.7655	40.9593
RNA-Seq data	TipCK	Tip ABA	LRH CK	LRH ABA	SRH CK	SRH ABA		standardization	TipCK	Tip ABA	LRH CK	LRH ABA	SRH CK	SRH ABA
OsPIN1a	12.3308	12.7352	11.0189	6.78646	4.52788	5.65826			1	1.0328	0.893608	0.550367	0.367201	0.458872
OsPIN1b	36.2609	51.1455	24.5932	27.1516	10.8217	18.3834			1	1.41049	0.678229	0.748785	0.29844	0.506976
OsPIN1c	0.448853	0.603896	1.99028	2.15963	0.666876	1.16659			1	1.34542	4.43415	4.81144	1.48573	2.59905
OsPIN1d	0.232615	0.199452	2.19767	2.36136	1.03136	1.18938			1	0.857434	9.44767	10.1514	4.43376	5.11308
OsPIN2	2.59967	3.24997	0.011747	0.099137	0.030142	0.049307			1	1.25015	0.00451865	0.0381345	0.0115945	0.0189666
OsPIN5a	0.004949	0.237017	2.86586	3.31207	3.46259	3.82716			1	47.8919	579.079	669.24	699.654	773.32
OsPIN5b	0	0.019411	0.006623	0.318272	0.046491	0.045507				1	0.341198	16.3965	2.39509	2.34439
OsPIN5c	0.046353	0.066062	1.4587	2.69876	7.17934	7.44762			1	1.42519	31.4694	58.2219	154.884	160.672
OsPIN8	0.027037	0.183757	0.886027	2.15059	1.448	2.33402			1	6.7965	32.7709	79.5425	53.5562	86.3269
OsPIN10a	0	0.013449	0.022045	0.210748	0.119239	0.343987				1	1.63916	15.6702	8.86601	25.5771
																R2=0.843434055492531
